# Supplementary material
Source: PubMed Central journal article supplement (PMC2746785)

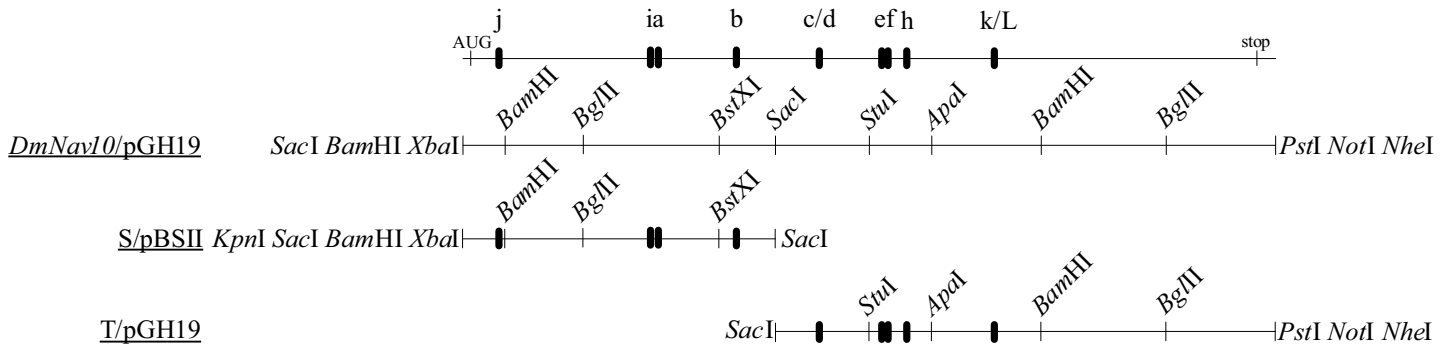

Supplement: 00613.2009_1.pdf [file 00613.2009_1.pdf]

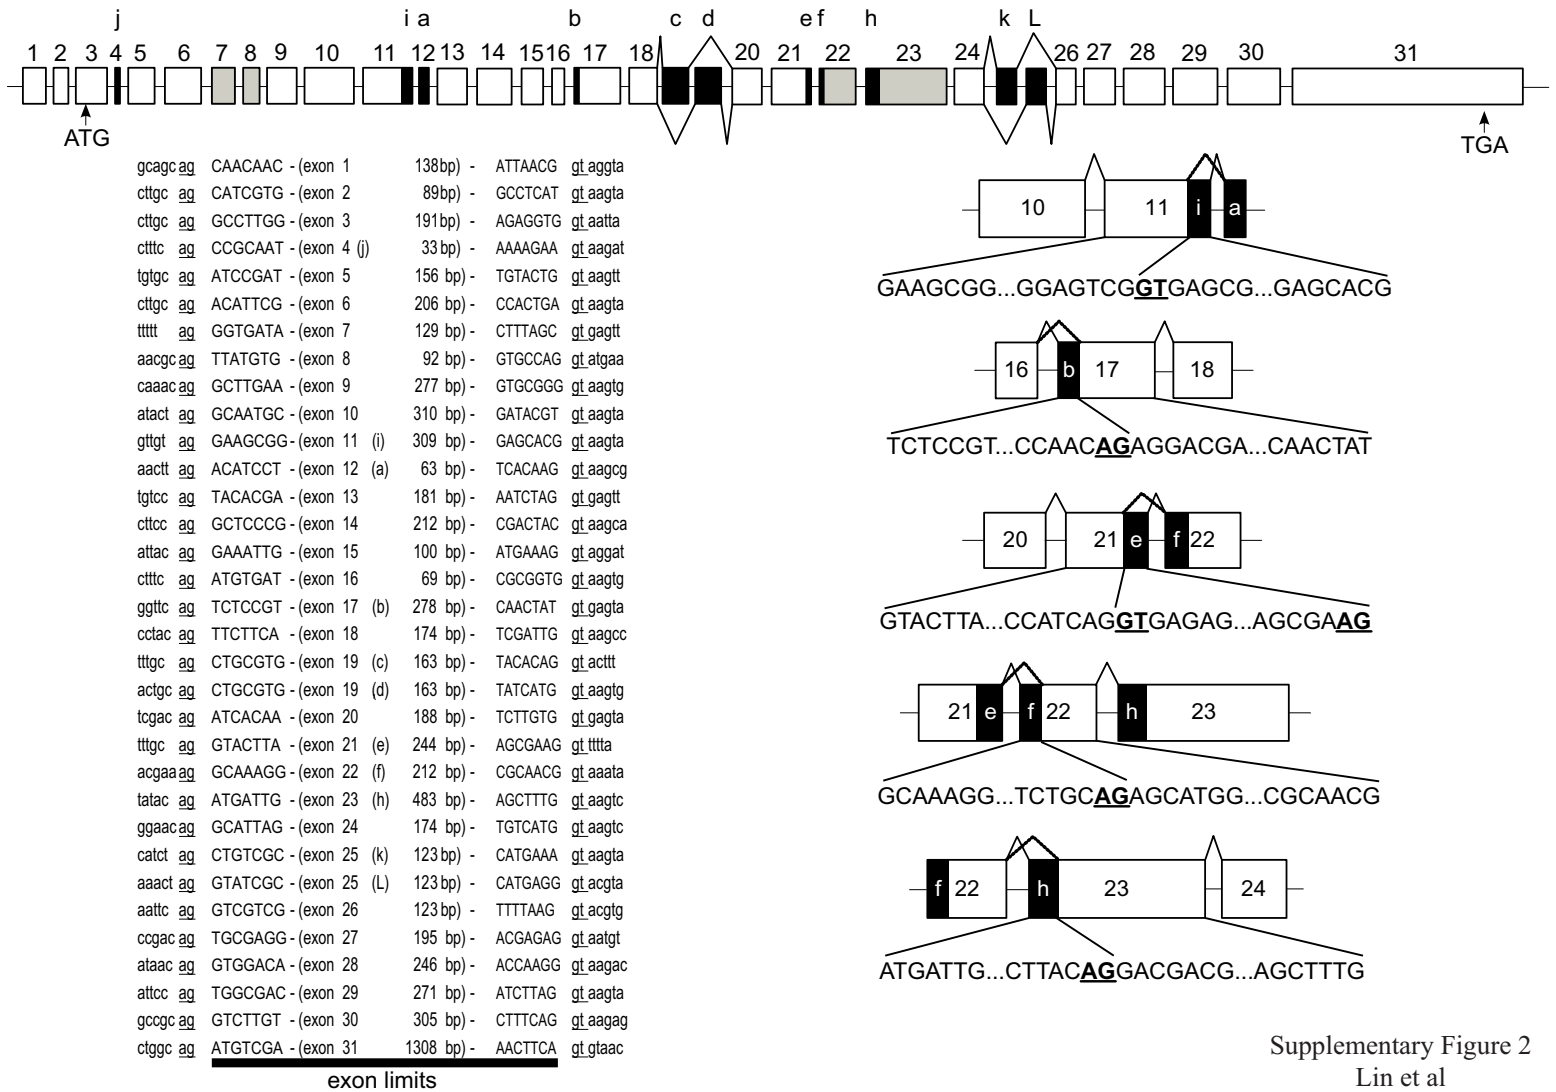

Supplement: 00613.2009_2.pdf [file 00613.2009_2.pdf]
